# Supplementary material
Source: Springer Nature journal article supplement (https://www.springermedizin.de/resource/supplementary/13049_2008_28_MOESM3_ESM.pdf/9665858)
Supplement: MOESM3 [file 9665858]

**Medical problem (table 2)**

|                      | n  | %      |
|----------------------|----|--------|
| No disease           | 83 | 21,5 % |
| Internal medicine    | 62 | 16,1 % |
| Trauma               | 59 | 15,3 % |
| Neurological disease | 51 | 13,2 % |
| Intoxication         | 43 | 11,1 % |
| Chest pain, AMI      | 21 | 5,4 %  |
| Cardiac arrest       | 20 | 5,2 %  |
| Other disease        | 47 | 12,2 % |
